# Supplementary material for: SARS-CoV-2 Nonstructural Proteins 1 and 13 Suppress Caspase-1 and the NLRP3 Inflammasome Activation
Source: MDPI journal article supplement (doi:10.3390/microorganisms9030494), 2021-02-26
Supplement: s1 [file s1]

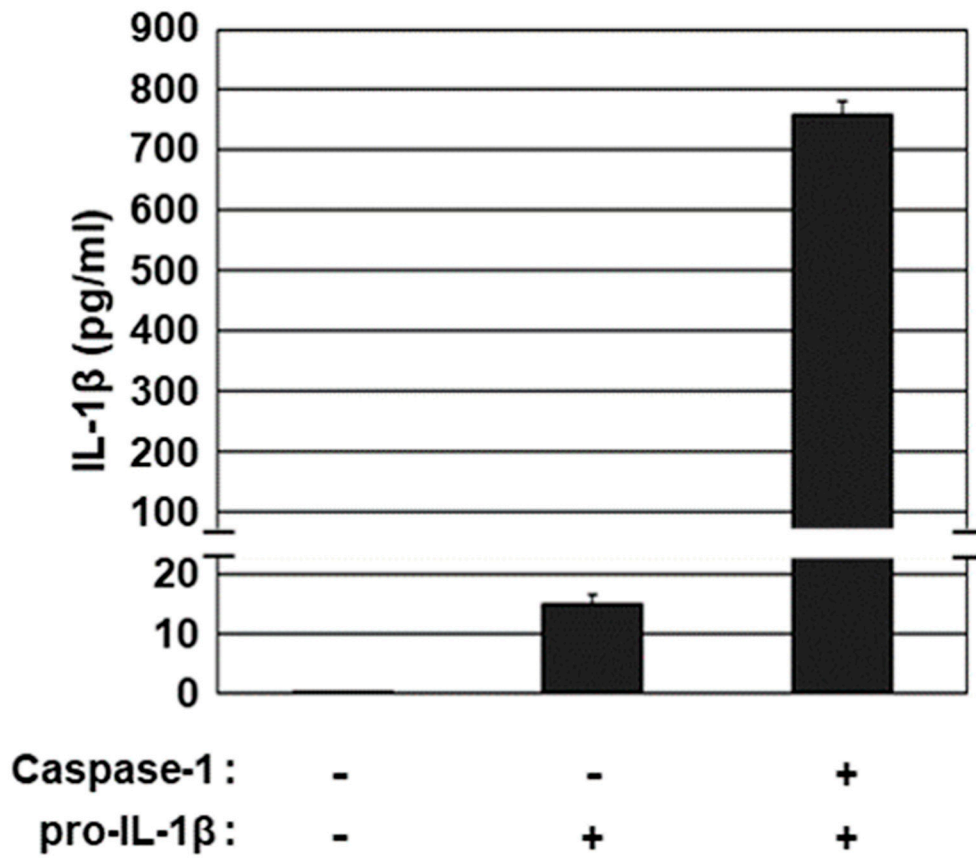

**Figure S1.** Caspase-1-mediated IL-1 $\beta$  secretion. HEK293T cells plated at  $8.0 \times 10^5$  cells/well in 6 well plates were transfected with a vector expressing pro-IL-1 $\beta$  with or without a vector expressing caspase-1. After 24 h, the secretion of mature IL-1 $\beta$  into culture supernatants was measured by ELISA. Data shown are representative of three independent experiments.

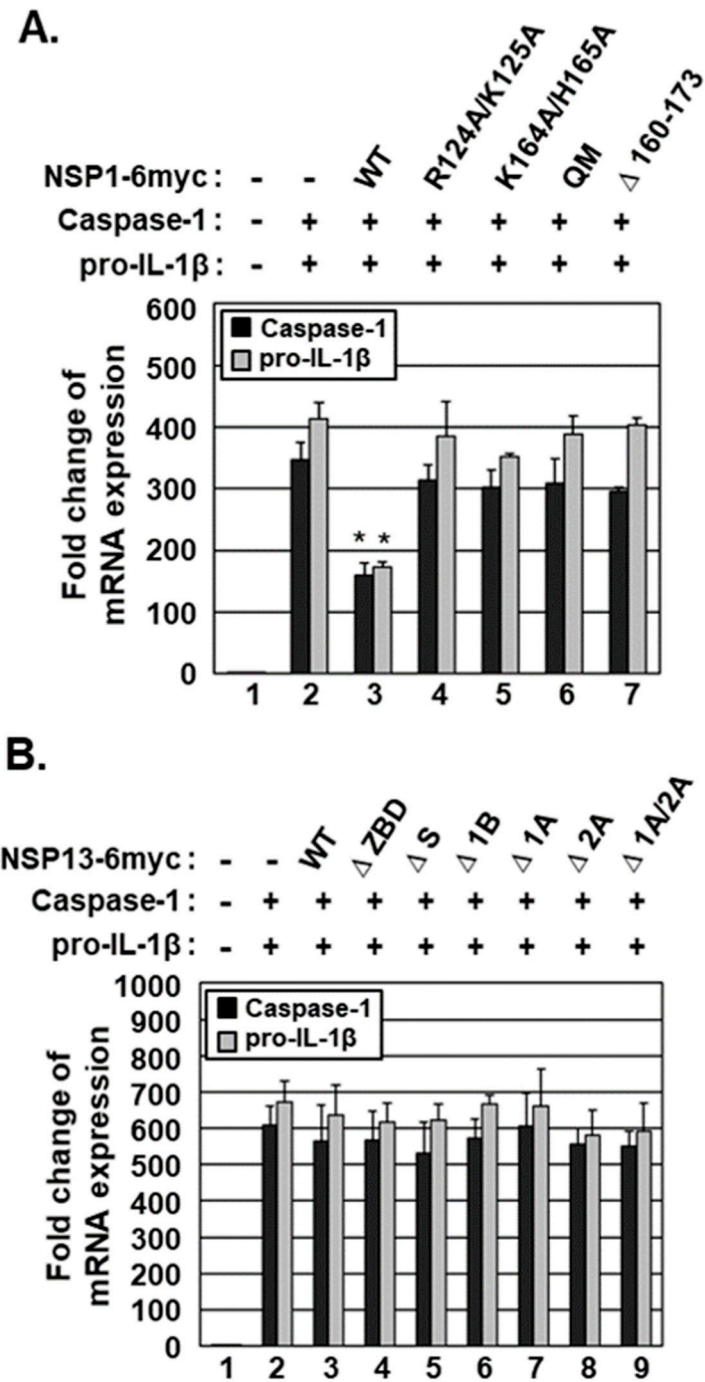

**Figure S2.** Effects of NSP1 and NSP13 on caspase-1 and IL-1 $\beta$  transcripts. HEK 293T cells were co-transfected with vectors expressing caspase-1 and pro-IL-1 $\beta$  plus either pEF1 $\alpha$ -DEST

or pEF1 $\alpha$ -DEST expressing (A) c-Myc-tagged NSP1 WT or NSP1 containing the mutations R124A/K125A, K164A/H165A, QM and  $\Delta$  160-173 or (B) c-Myc-tagged NSP13 WT or mutants carrying deletions of the ZBD ( $\Delta$ ZBD), the stalk domain ( $\Delta$ S), the 1B domain ( $\Delta$ 1B), the two RecA-like domains, 1A ( $\Delta$ 1A) and 2A ( $\Delta$ 2A) and both 1A and 2A ( $\Delta$ 1A/2A). After 24 h, the relative levels of caspase-1 and IL-1 $\beta$  mRNAs were measured by qRT-PCR. Caspase-1 and IL-1 $\beta$  mRNA levels in control cells were set as 1. \* $P < 0.001$  by unpaired two-tailed Student's  $t$ -tests. Data shown are representative of three independent experiments.

**Table S1.** List of primers used to generate NSP1 and 13 mutants

| Primer                  | Sequence                                       |
|-------------------------|------------------------------------------------|
| NSP1 R124A/K125A F      | CTTACAGAAAGGTGCTGCTGGCTGCGAACGGAAACAA          |
| NSP1 R124A/K125A R      | CGGCACCCTTGTTTCCGTTTCGCAGCCAGCAGCACCTTTCTGTAAG |
| NSP1 K164A/H165A F      | CAGGAAAACCTGGAACACCGCGGCCAGCTCCGGAGTGACCAG     |
| NSP1 K164A/H165A R      | CTGGTCACTCCGGAGCTGGCCGCGGTGTTCCAGTTTTCCTG      |
| NSP1 $\Delta$ 160-173 F | ATGCGTGAACCTGAACGGT                            |
| NSP1 $\Delta$ 160-173 R | TTCCTGGAAGTCCTCGTAA                            |
| NSP13 $\Delta$ ZBD F    | CATGCCAACTTTTTTGTACAA                          |
| NSP13 $\Delta$ ZBD R    | TCCGACAACGTGACCGA                              |
| NSP13 $\Delta$ S F      | GCCCACGCAGGTGTTCTT                             |
| NSP13 $\Delta$ S R      | GGTATCGCTACCGTGCGT                             |
| NSP13 $\Delta$ 1B F     | GTAAGACAGCTTGAAGGT                             |
| NSP13 $\Delta$ 1B R     | GAGTTCAGCTCCAACGTG                             |
| NSP13 $\Delta$ 1A F     | GTCGGAGATGTTTCAGGGT                            |
| NSP13 $\Delta$ 1A R     | CGCCGCTGCCCTGCTGAA                             |
| NSP13 $\Delta$ 2A F     | GCAGGTACCCAGGAACAT                             |
| NSP13 $\Delta$ 2A R     | TACCCAACCTTCTTGTACA                            |
